# Supplementary material
Source: ML conference proceedings conference paper supplement (https://openaccess.thecvf.com/content/ACCV2024/html/Chen_Seamless-Through-Breaking_Rethinking_Image_ACCV_2024_paper.html)
Supplement: Supplementary file 1 [file Chen_Seamless-Through-Breaking_Rethinking_Image_ACCV_2024_supplemental.pdf]

# Seamless-Through-Breaking: Rethinking Image Stitching for Optimal Alignment (Supplemental Material)

## 1 Additional Results

We present additional image stitching results obtained using our method, demonstrating that the stitched images appear seamless, as though they were captured in a single shot.

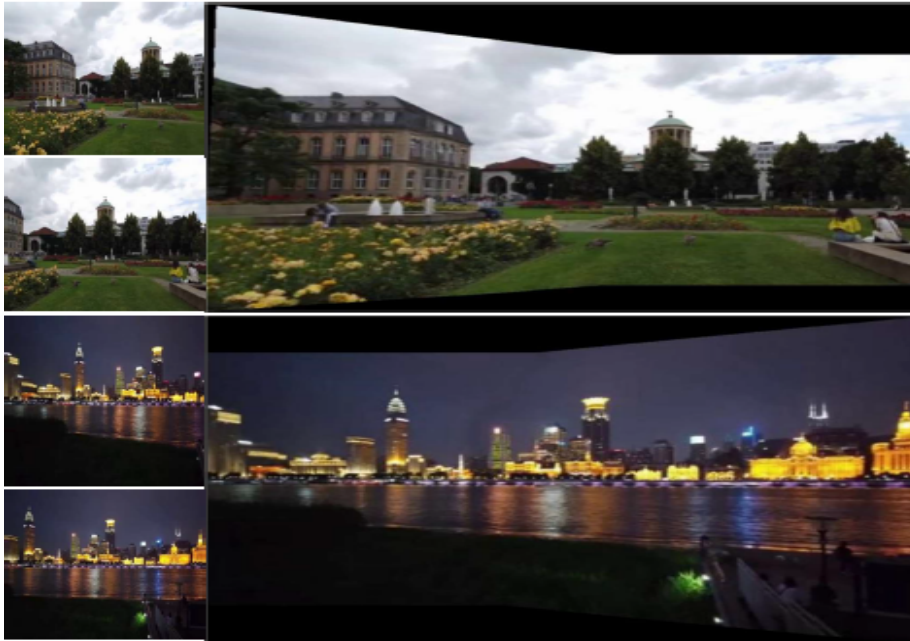

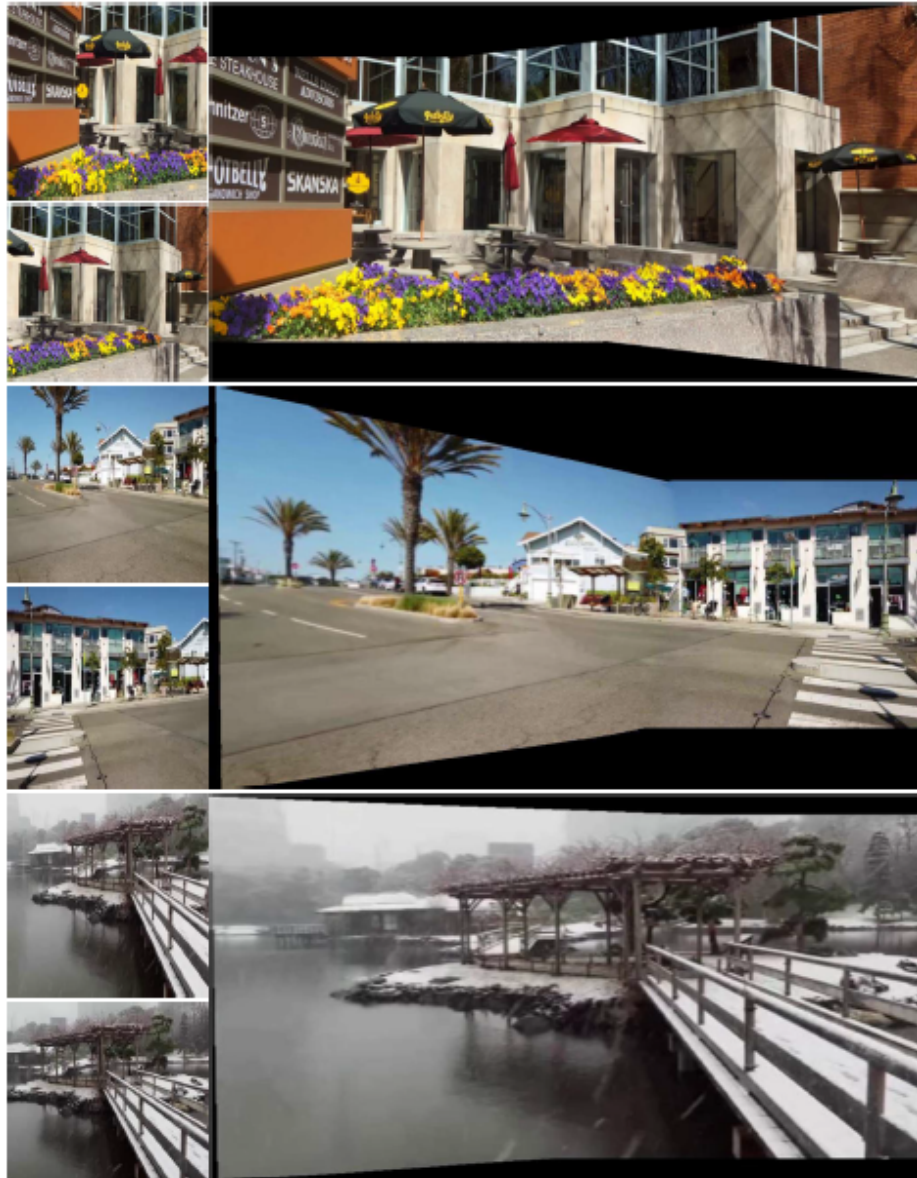

**Fig. 1.** Image stitching results using our method. The left column contains the source images, while the right column shows the stitched images.
